# Supplementary material for: Shake flask methodology for assessing the influence of the maximum oxygen transfer capacity on 2,3-butanediol production
Source: PubMed Central journal article supplement (PMC6498610; doi:10.1186/s12934-019-1126-9), 2019-05-03

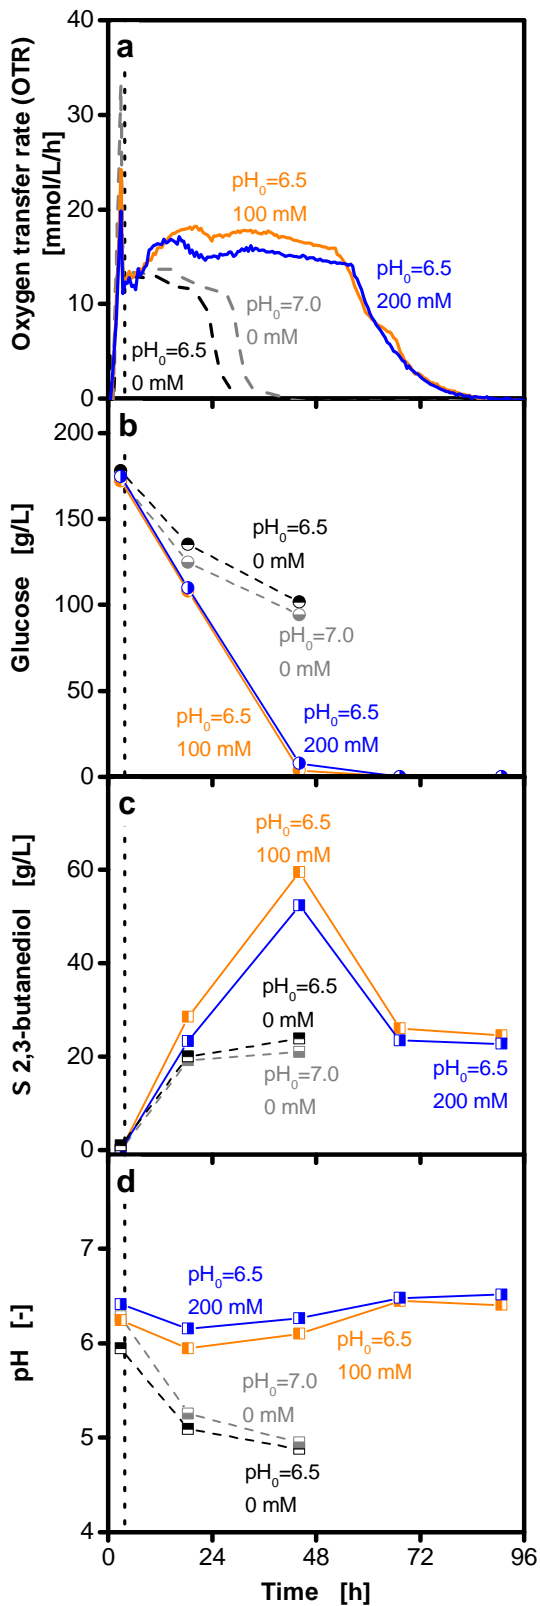

Supplement: 12934_2019_1126_MOESM1_ESM.pdf [file 12934_2019_1126_MOESM1_ESM.pdf]
